# Supplementary material for: Residual dipolar couplings as a tool for structural analysis of ionic liquids
Source: Royal Society of Chemistry journal article supplement (doi:10.1039/d3cc00929g), 2023-01-01
Supplement: d3cc00929g1.pdf [file d3cc00929g1.pdf]

## Supporting Information

### Residual Dipolar Couplings as a Tool for Structural Analysis of Ionic Liquids

Higor D. F. de Melo,<sup>a</sup> Daiane S. Carvalho,<sup>a</sup> Fernando Hallwass,<sup>a</sup> Ulrich Sternberg<sup>b,c</sup> and Armando Navarro-Vázquez<sup>\*,a</sup>

<sup>a</sup>Departamento de Química Fundamental, Centro de Ciências Exatas e da Natureza (CCEN), Universidade Federal de Pernambuco, Avenida Jornalista Fernandes s/n. Cidade Universitária. 50740-560, Recife, Pernambuco, Brazil.

<sup>b</sup>Research Partner of Karlsruhe Institute of Technology (KIT), Karlsruhe Germany.

<sup>c</sup>COSMOS-Software, Jena, Germany. <http://www.cosmos-software.de>.

|                                                                            |           |
|----------------------------------------------------------------------------|-----------|
| <b>1. Description of NMR experiments</b>                                   | <b>2</b>  |
| <b>2. NMR spectra of Ionic Liquid BMIM·NTf<sub>2</sub><sup>-</sup></b>     | <b>3</b>  |
| <b>3. NMR spectra of Ionic Liquid EMIM·BF<sub>4</sub><sup>-</sup></b>      | <b>7</b>  |
| <b>6. MDOC simulations</b>                                                 | <b>11</b> |
| <b>7. Swelling of cross-linked DMA/ACN gels in different ionic liquids</b> | <b>16</b> |
| <b>8. BMIM cation XYZ geometries (Å)</b>                                   | <b>16</b> |
| <b>9. References</b>                                                       | <b>23</b> |

## 1. Description of NMR experiments

All NMR experiments, for the IL swollen gels in the relaxed and compressed states, were performed on an Agilent 400 MHz spectrometer, operating at 298 K, with resonance frequencies of 399.75 MHz for  $^1\text{H}$ , 61.36 MHz for  $^2\text{H}$ , and 100.52 MHz for  $^{13}\text{C}$ .

The  $^1\text{H}$  NMR spectrum was acquired using a single pulse sequence, with a  $45^\circ$  pulse of 5.35  $\mu\text{s}$ , acquisition time of 2.55 s, 8 transients, relaxation delay of 1.0 s, spectral width of 6400 Hz.

The  $^{13}\text{C}$  NMR spectrum was acquired with a  $45^\circ$  pulse of 4.86  $\mu\text{s}$ , acquisition time of 1.31 s, relaxation delay of 1.0 s, spectral width of 25.0 kHz, 80 transients for  $\text{BMIM}\cdot\text{NTf}_2^-$  in DMA/ACN gel (75:25 v/v), 128 transients for  $\text{EMIM}\cdot\text{BF}_4^-$  and  $\text{BMIM}\cdot[\text{N}(\text{CN})_2]^-$  in DMA/ACN gel (75:25 v/v).

The gated-decoupled  $\{^1\text{H}\}\text{-}^{13}\text{C}$  spectra were acquired with an acquisition time of 1.31 s, relaxation delay of 1.0 s, spectral width of 25.0 kHz, 80 transients for  $\text{BMIM}\cdot\text{NTf}_2^-$  in DMA/ACN gel (75:25 v/v), 256 transients for  $\text{EMIM}\cdot\text{BF}_4^-$  and  $\text{BMIM}\cdot[\text{N}(\text{CN})_2]^-$  in DMA/ACN gel (75:25 v/v).

The one-dimensional 1D-NOESY spectrum was performed using the Agilent provided DDPFGSE<sup>[1]</sup> experiment with acquisition time of 2.55 s, 64 transients, relaxation delay of 1.0 s and spectral width of 4.0 kHz, the mixing time was 300 ms for  $\text{BMIM}\cdot\text{NTf}_2^-$  in DMA/ACN gel (75:25 v/v), and 500 ms for  $\text{EMIM}\cdot\text{BF}_4^-$  in DMA/ACN gel (75:25 v/v) and 500 ms for  $\text{BMIM}\cdot[\text{N}(\text{CN})_2]^-$ .

All NMR experiments were run unlocked.

## 2. NMR spectra of Ionic Liquid BMIM·NTf<sub>2</sub><sup>-</sup>

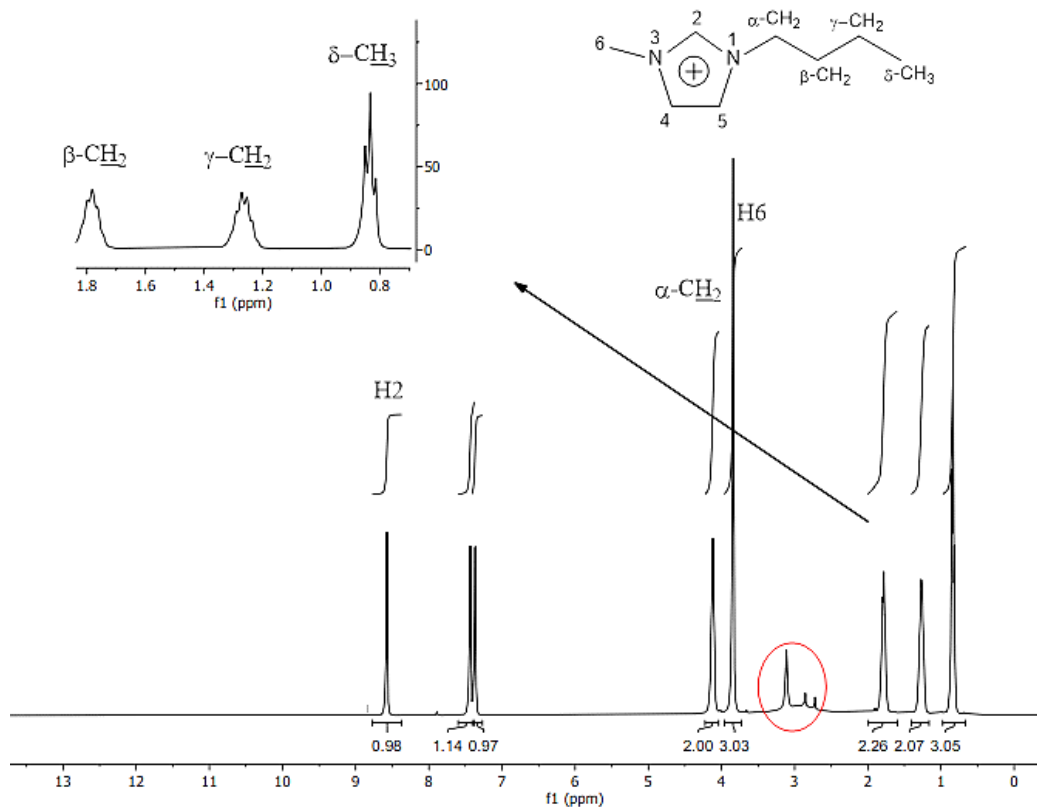

Figure S1. <sup>1</sup>H NMR spectrum (399.75 MHz) of compound BMIM·NTf<sub>2</sub><sup>-</sup> on DMA/ACN gel (75:25 v/v) in relaxed state at 298K.

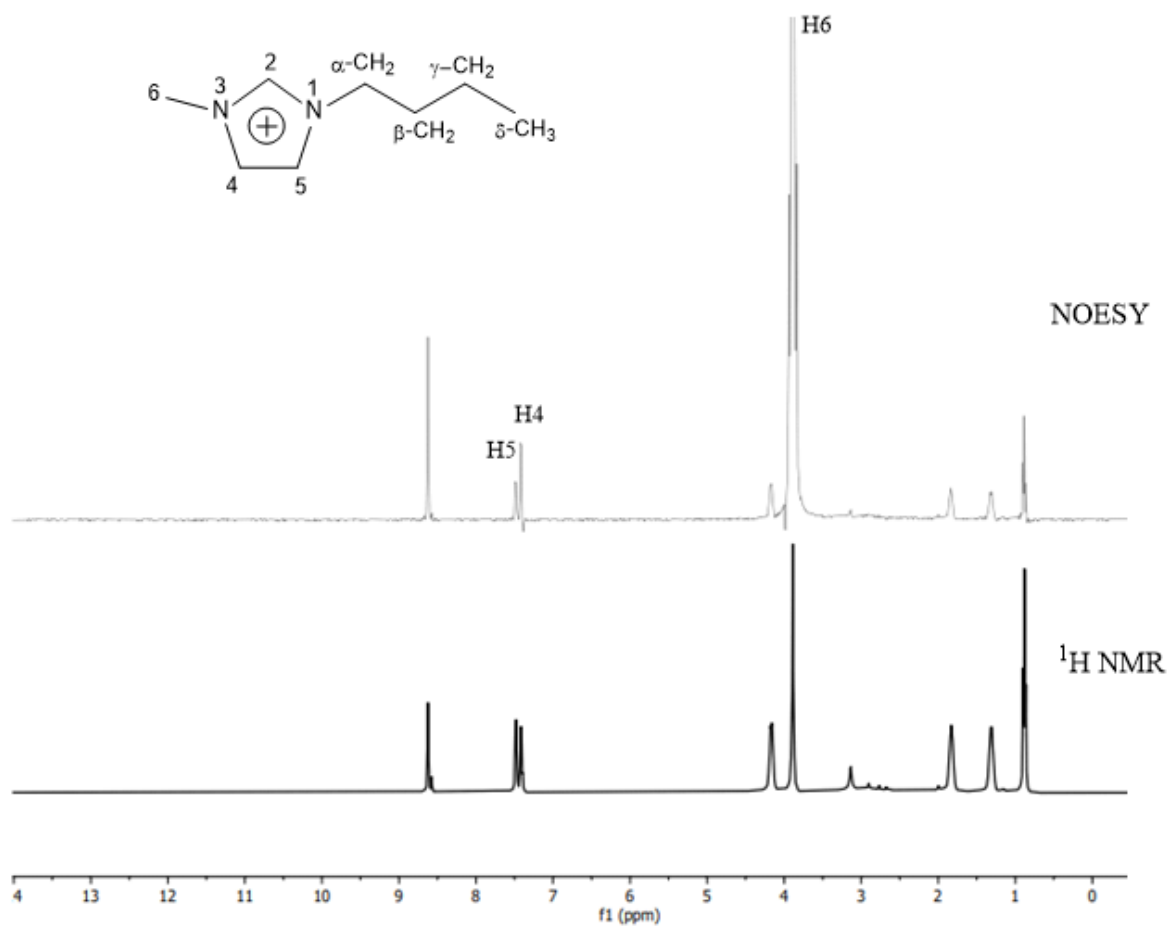

Figure S2. Top: 1D-NOESY (mixing time: 300 ms) (top) and standard <sup>1</sup>H (bottom) spectra of [BMIM·NTf<sub>2</sub>] in the DMA/ACN gel (75:25 v/v) in the relaxed state at 298K. The Me6 signal for the IL inside the gel was selectively inverted. Note the negative NOE effects observed in the 1D-NOESY spectrum.

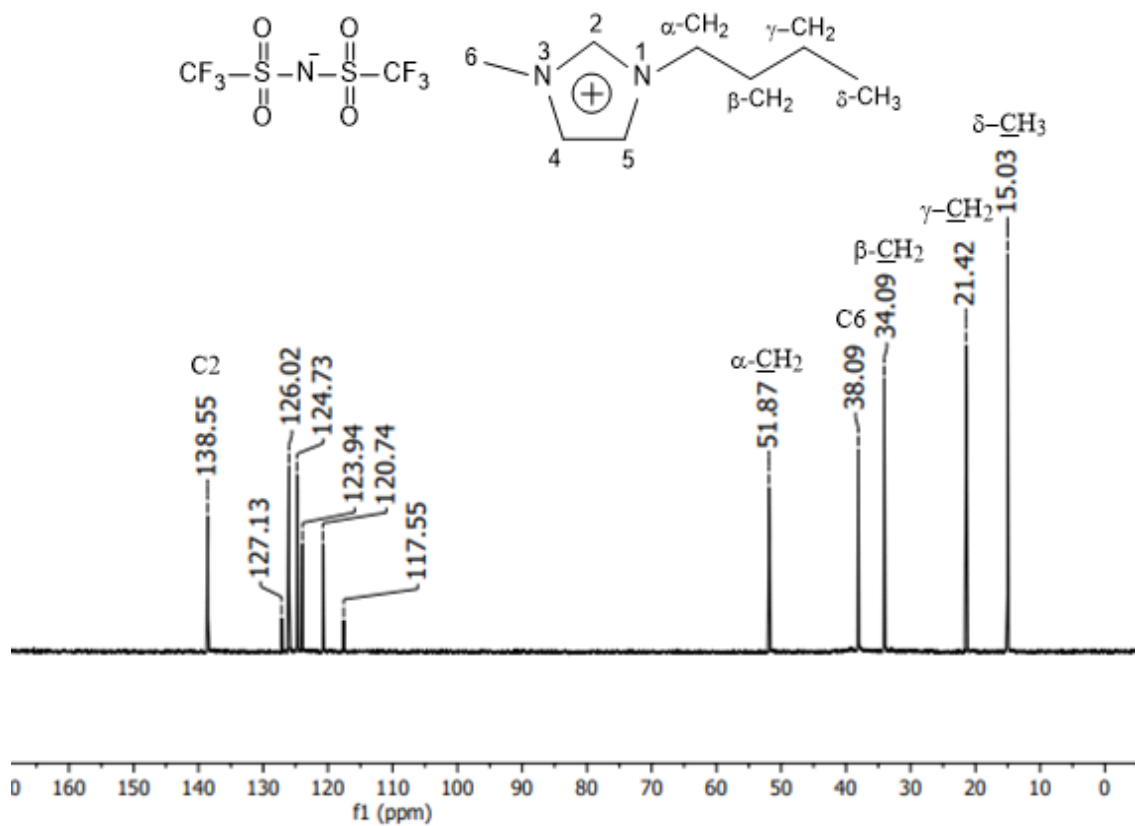

Figure S3. <sup>13</sup>C NMR spectrum (100.51 MHz) of Ionic Liquid [BMIM·NTf<sub>2</sub>] at 298K.

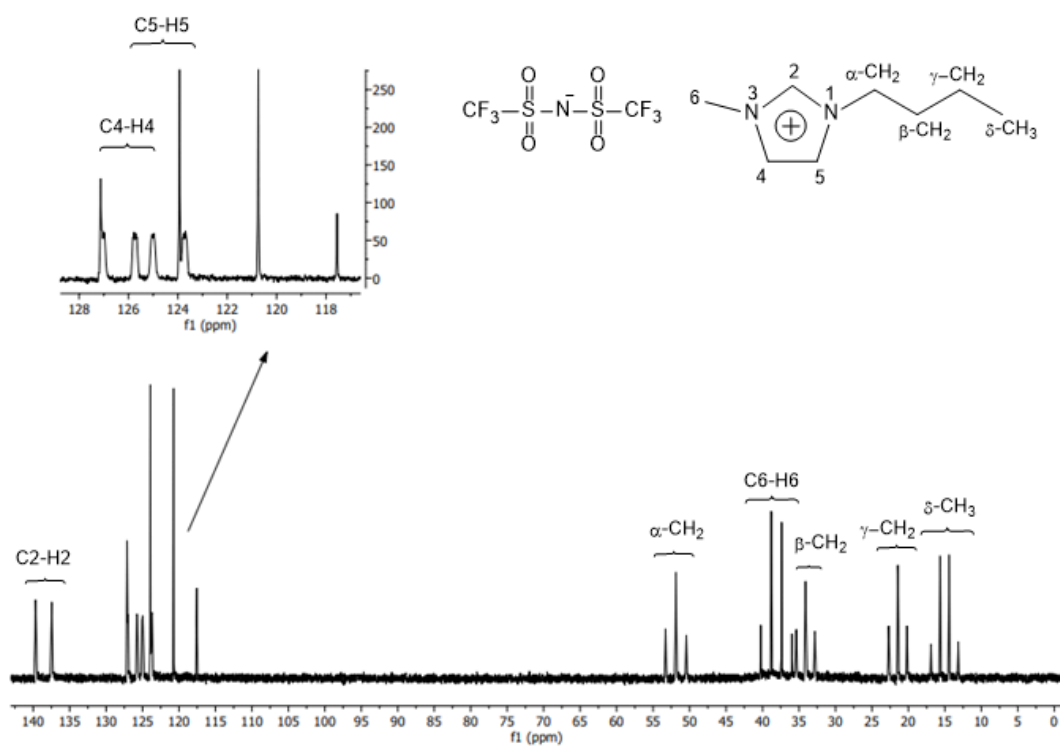

Figure S4.  $\{^1\text{H}\}$ - $^{13}\text{C}$  gated-decoupled spectrum of  $[\text{BMIM}\cdot\text{NTf}_2^-]$  on DMA/ACN gel (75:25 v/v) in the relaxed state.

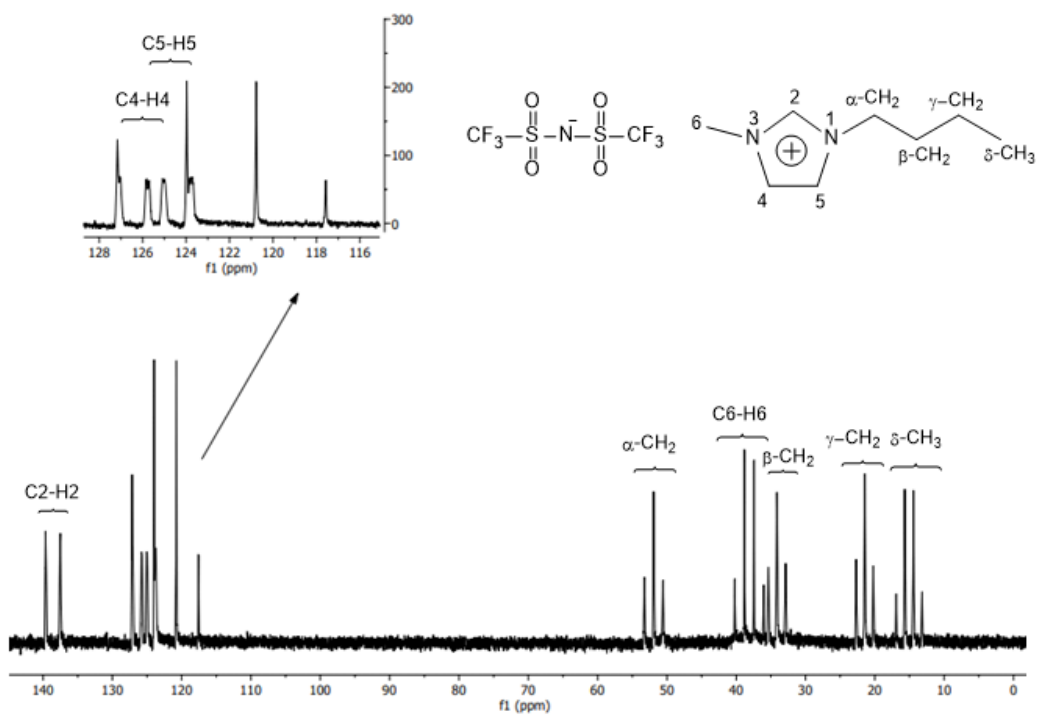

Figure S5.  $\{^1\text{H}\}$ - $^{13}\text{C}$  gated-coupled spectrum of  $[\text{BMIM}\cdot\text{NTf}_2^-]$  on DMAC/ACN gel (75:25 v/v) in the compressed state.

### 3. NMR spectra of Ionic Liquid EMIM·BF<sub>4</sub><sup>-</sup>

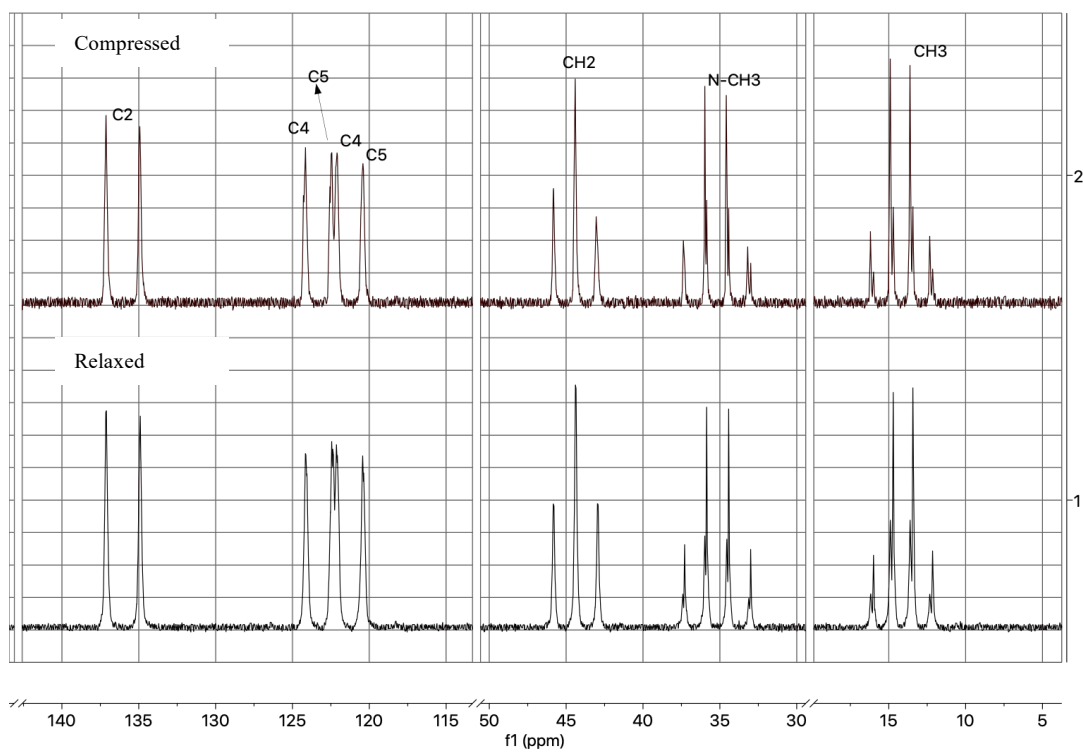

Figure S6. <sup>1</sup>H-<sup>13</sup>C-gated-decoupled spectra for the compressed and relaxed EMIM·BF<sub>4</sub><sup>-</sup>/(DMA/ACN 75:25) system.

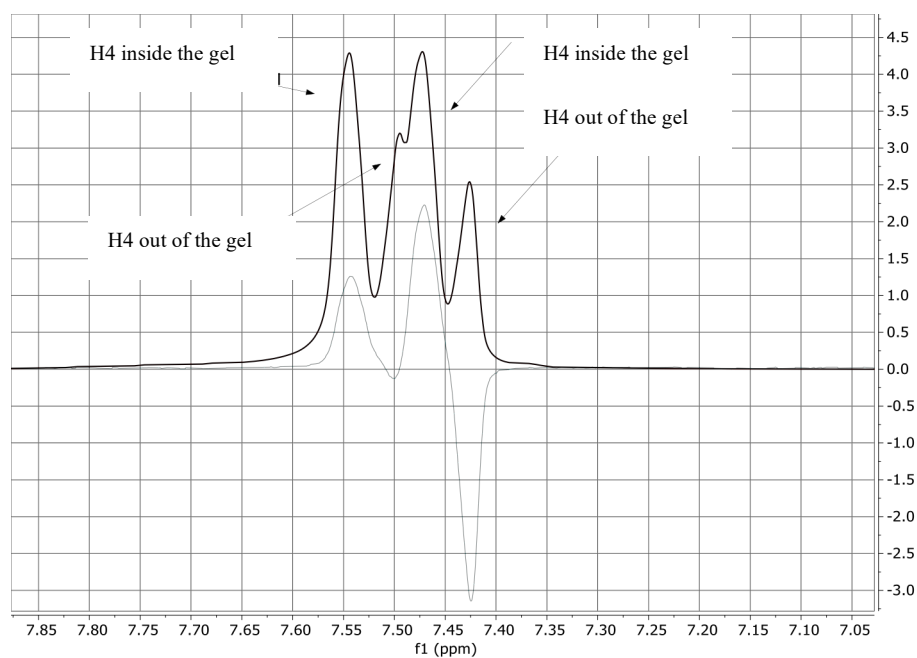

Figure S7. Red:  $^1\text{H}$  spectrum; blue: H4 region in the 1D-NOESY spectrum of  $\text{EMIM}\cdot\text{BF}_4^-$  (mixing time=500 ms) upon inversion of the methyl signal at position 6. Note the different sign of the NOE effect for the isotropic IL vs the IL inside the gel.

#### 4. NMR spectra of Ionic Liquid $\text{BMIM}\cdot[\text{N}(\text{CN})_2]^-$

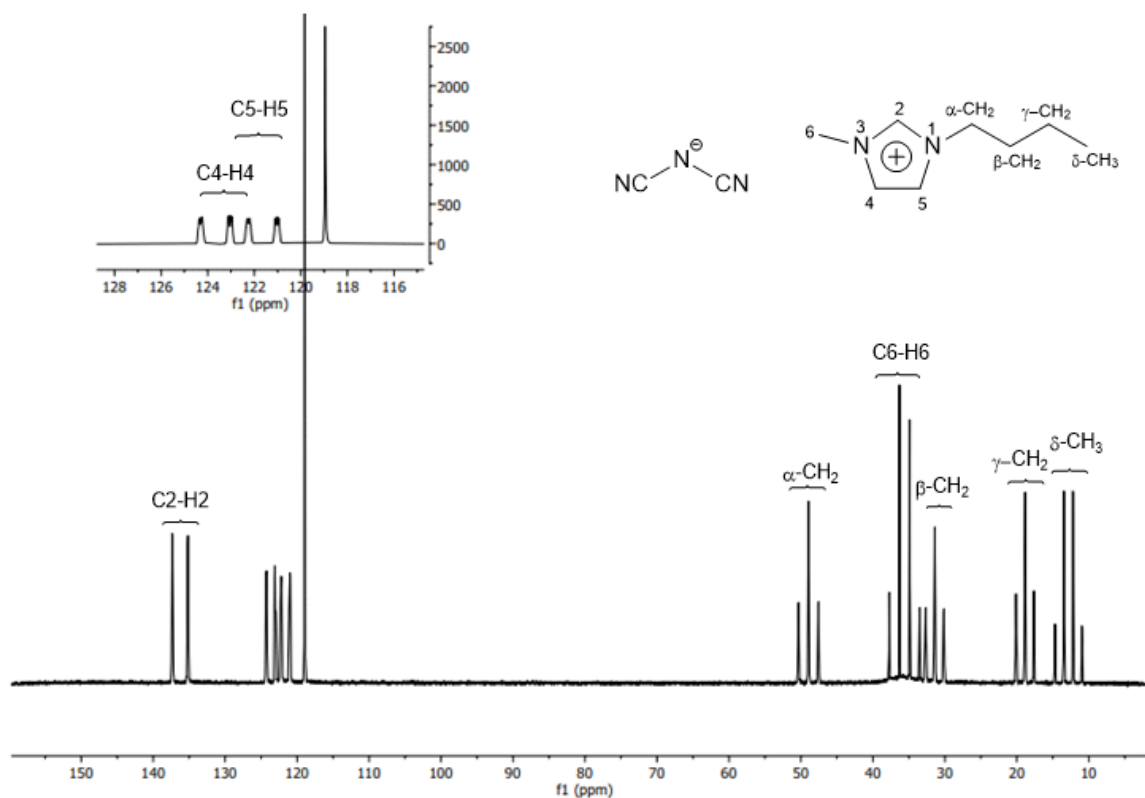

Figure S8.  $\{^1\text{H}\}$ - $^{13}\text{C}$  gated-decoupled spectrum of  $\text{BMIM}\cdot[\text{N}(\text{CN})_2]^-$  on DMA/ACN gel (75:25 v/v) in compressed state.



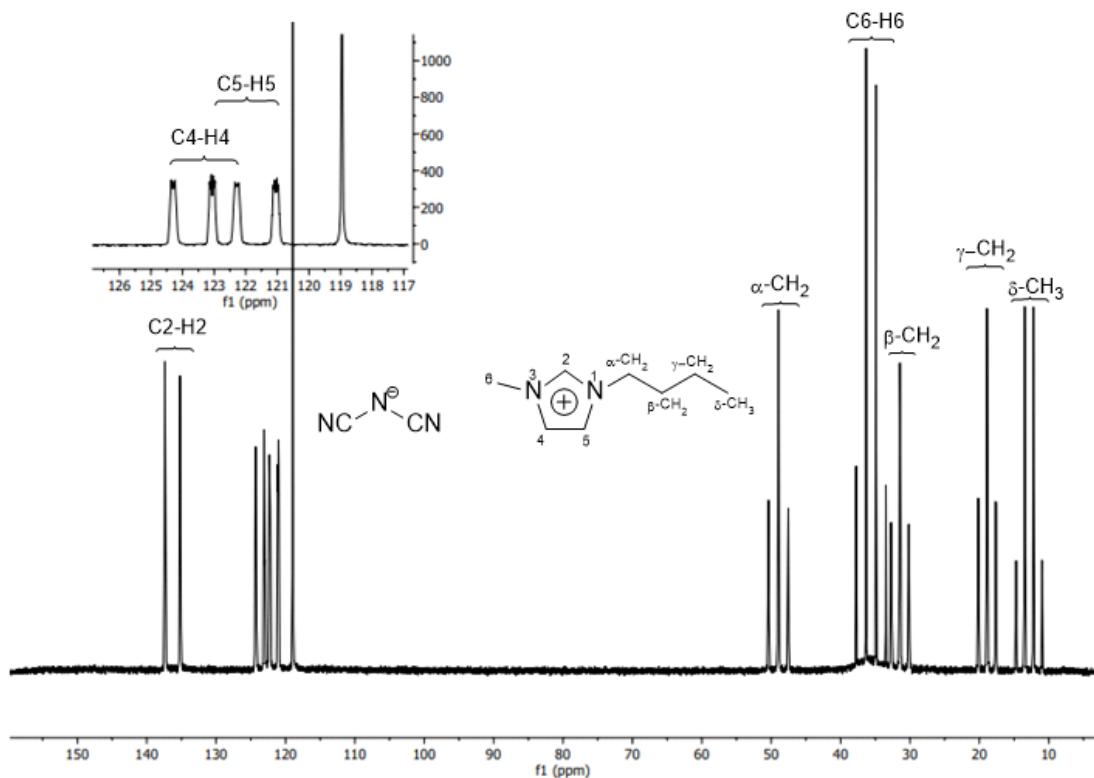

Figure S19.  $\{^1\text{H}\}$ - $^{13}\text{C}$  gated-decoupled spectrum of  $\text{BMIM}\cdot[\text{N}(\text{CN})_2]^-$  on DMA/ACN gel (75:25 v/v) in relaxed state.

### 5. RDC based conformational analysis of BMIM cation ( $\text{BMIM}\cdot\text{NTf}_2^-$ )

The conformational space of the BMIM cation was first explored using the GMMX program inside the MNova/StereoFitter 14.2 package<sup>[2]</sup> and the MMFF94 force field. All enantiomeric conformations are discarded by the GMMX program. The nine obtained conformations were optimized at the M062X/6-31+G\*\* level of theory using the Gaussian09<sup>[3]</sup> package and the ultrafine grid.

The  $^1D^{\text{CH}}$  obtained RDCs were then fit to each of the obtained geometries using the Singular Value Decomposition procedure as implemented in the MSpin package.<sup>[4]</sup> The quality of the fitting is expressed in terms of the quality factor (Table S1).<sup>[5]</sup>

$$Q = \sqrt{\frac{\sum_i (D_i^{\text{exp}} - D_i^{\text{calc}})^2}{\sum_i (D_i^{\text{exp}})^2}}$$

A single tensor multi-conformer analysis of the BMIM cation was performed in the following way. First all conformations were aligned by minimizing the least-square distance between heavy atoms

in the molecule using mass weighted coordinates. Since only eight  $^1D_{CH}$  RDCs were measured it is not possible to determine the populations for the nine conformations. Hence, all possible combinations of conformations, with increasing number of conformers, were generated and populations fit, using the MNova/StereoFitter software, using a described procedure where alignment tensor components and populations are simultaneously fit (Table S2).<sup>[6]</sup>

Table S1. Conformations found for the BMIM cation from the adjustment of the RDC for each structure individually

| <b>Conformation</b> | <b>Type</b> | <b><math>\Delta E</math><br/>(kcal/mol)</b> | <b><math>Q</math></b> |
|---------------------|-------------|---------------------------------------------|-----------------------|
| #1                  | G+A         | 0.00                                        | 0.217                 |
| #2                  | G-A         | 0.47                                        | 0.204                 |
| #3                  | AA          | 0.70                                        | 0.199                 |
| #4                  | G+G+        | 0.14                                        | 0.136                 |
| #5                  | G-G-        | 0.64                                        | 0.293                 |
| #6                  | AG+         | 1.11                                        | 0.234                 |
| #7                  | AG-         | 1.08                                        | 0.303                 |
| #8                  | G+G-        | 1.02                                        | 0.213                 |
| #9                  | G-G+        | 1.44                                        | 0.329                 |

a) SCF M062X/6-31+G\*\* energy differences

Table S2. Set of conformations found from the  $Q$  factor.

| <b>Number<br/>conformations</b> | <b>Conformation</b> | <b>Population<br/>(%)</b> | <b><math>Q</math></b> |
|---------------------------------|---------------------|---------------------------|-----------------------|
| <b>1</b>                        | G+G+                | 100                       | 0.136                 |
| <b>2</b>                        | G+G+; G-G-          | 93, 7                     | 0.083                 |

There is an important decrease in the quality factor by allowing the G+G+ conformation to mix with the G-G-. However, examination of the individual contributions of the RDCs to the conformationally averaged RDCs shows very large RDCs for individual conformations. The large GDO<sup>[7]</sup> value of ( $2.9 \cdot 10^{-3}$ ) that the good quality of the fitting could be probably artifactual and the single-tensor procedure is a too rough approximation for such a small system where conformational jumping largely modifies the overall molecular shape.

| Coupling                  | Exp.  | G+G+ <sup>a</sup> | G-G- <sup>a</sup> | G+G+ <sup>b</sup> | G-G- <sup>b</sup> | G+G+/G-G- <sup>c</sup> |
|---------------------------|-------|-------------------|-------------------|-------------------|-------------------|------------------------|
| $\delta$ -CH <sub>3</sub> | -0.1  | 1.8               | 3.7               | -0.0              | 9.7               | 0.6                    |
| $\gamma$ -CH <sub>2</sub> | -0.8  | -0.9              | 0.4               | -4.0              | 36.2              | -1.3                   |
| $\beta$ -CH <sub>2</sub>  | -3.8  | -4.1              | -3.3              | -2.4              | -15.9             | -3.3                   |
| $\alpha$ -CH <sub>2</sub> | -8.2  | -8.3              | -6.9              | -6.3              | -42.6             | -8.7                   |
| 6                         | -3.8  | -4.2              | -4.8              | -3.8              | -8.1              | -4.1                   |
| 5                         | -1.1  | -1.2              | -0.8              | 0.7               | -31.0             | -1.4                   |
| 4                         | 5.3   | 5.3               | 4.7               | 9.3               | -55.5             | 4.9                    |
| 2                         | -10.7 | -10.0             | -10.1             | -4.0              | -98.8             | -10.4                  |

a) Single conformer SVD fitting b) Predicted RDCs in single tensor fitting of a 93:7 G+G+/G-G-ensemble c) Predicted conformationally averaged RDCs in single tensor fitting of a 93:7 G+G+/G-G-ensemble

## 6. MDOC simulations

### 6.1 Parametrization of the MDOC simulations

We moved then to the MDOC procedure<sup>[8]</sup> where the  $^1D_{CH}$  RDCs act as time-average constraints<sup>[9]</sup> over a force-field based molecular dynamics simulation. The COSMOS polarizable force-field.<sup>[10][11]</sup> was employed in the MD run as implemented in the COSMOS 6.0 software package.<sup>[12]</sup> Simulation of the BMIM system made use of the same RDC constraints as in the above single-tensor analysis. Two MDOC simulations are performed: MDOC 1 with only RDC constraints and in MDOC 2 constraints from  $^3J_{HH}$  couplings are added. The parameters for the MDOC runs are given in Table 1.

Table 1: Simulation parameters for MDOC Simulations

| General parameters for the MDOC simulation                            |                                              |
|-----------------------------------------------------------------------|----------------------------------------------|
| Parameter                                                             | Value                                        |
| Target temperature                                                    | 290 K                                        |
| Mean temperature                                                      | 303.5 K                                      |
| MD time step                                                          | 0.5 fs                                       |
| Total MDOC duration                                                   | 40 ns                                        |
| BPT atomic charge calculation                                         | 2 fs                                         |
| Coupling time $\eta$ to the heat bath                                 | 0.02 ps                                      |
| Memory decay time $\tau$ for running RDC average                      | 200 ps                                       |
| Time constant $\rho$ for the exponential rise of pseudo-forces        | 200 ps                                       |
| Order parameter of the alignment medium $S_{am}$                      | 0.004                                        |
| Width parameters for the RDC pseudo forces                            | 0.5 Hz                                       |
| Weight parameters for the RDC pseudo forces                           | 0.0003 kJ mol <sup>-1</sup> Hz <sup>-1</sup> |
| Pseudo-force width $\Delta J$ for the $^3J_{HH}$ coupling constraints | 1.0 Hz                                       |
| Weight parameter for the pseudo-forces of the $^3J_{HH}$ couplings    | 6 kJ mol <sup>-1</sup> Hz <sup>-1</sup>      |

## 6.2 MDOC Results

Table S3: Experimental RDC compared with calculated values from the MDOC simulation 1 with RDC constrains only on BMIM·NTf<sub>2</sub><sup>-</sup>

| Coupling proton | Coupling carbon | RDC exp. / Hz | RDC calc. / Hz | Diff. / Hz | Error exp. / Hz |
|-----------------|-----------------|---------------|----------------|------------|-----------------|
| H5              | C5              | -1.1          | -1.3014        | 0.201      | 0.5             |
| H4              | C4              | 5.3           | 5.0259         | 0.274      | 0.5             |
| H2              | C2              | -10.7         | -10.3465       | -0.353     | 0.5             |
| H6c             | C6              | -3.8          | -3.6184        | -0.182     | 0.5             |
| H6a             | C6              | -3.8          | -3.6146        | -0.185     | 0.5             |
| H6b             | C6              | -3.8          | -3.6200        | -0.180     | 0.5             |
| Ha_proS         | Ca              | -8.2          | -8.0180        | -0.182     | 0.5             |
| Ha_proR         | Ca              | -8.2          | -8.0135        | -0.186     | 0.5             |
| Hb_proS         | Cb              | -3.8          | -3.7379        | -0.062     | 0.5             |
| Hb_proR         | Cb              | -3.8          | -3.7316        | -0.068     | 0.5             |
| Hg_proS         | Cg              | -0.8          | -0.8347        | 0.035      | 0.5             |
| Hg_proR         | Cg              | -0.8          | -0.8331        | 0.033      | 0.5             |
| Hdb             | Cd              | -0.1          | -0.0616        | -0.038     | 0.5             |
| Hda             | Cd              | -0.1          | -0.0590        | -0.041     | 0.5             |
| Hdc             | Cd              | -0.1          | -0.0645        | -0.036     | 0.5             |

Quality  $n/\chi^2 = 8.85$ Table S4: Experimental RDC compared with calculated values from the MDOC simulation 2 with RDC and <sup>3</sup>J<sub>HH</sub> constraints on BMIM·NTf<sub>2</sub><sup>-</sup>

| Coupling proton | Coupling carbon | RDC exp. / Hz | RDC calc. / Hz | Diff. / Hz | Error exp. / Hz |
|-----------------|-----------------|---------------|----------------|------------|-----------------|
| H5              | C5              | -1.1          | -1.2965        | 0.196      | 0.5             |
| H4              | C4              | 5.3           | 5.0440         | 0.256      | 0.5             |
| H2              | C2              | -10.7         | -10.360        | -0.340     | 0.5             |
| H6c             | C6              | -3.8          | -3.6365        | -0.164     | 0.5             |
| H6a             | C6              | -3.8          | -3.6342        | -0.166     | 0.5             |
| H6b             | C6              | -3.8          | -3.6336        | -0.166     | 0.5             |
| Ha_proS         | Ca              | -8.2          | -8.0309        | -0.169     | 0.5             |
| Ha_proR         | Ca              | -8.2          | -8.0269        | -0.173     | 0.5             |
| Hb_proS         | Cb              | -3.8          | -3.7796        | -0.020     | 0.5             |
| Hb_proR         | Cb              | -3.8          | -3.7345        | -0.066     | 0.5             |
| Hg_proS         | Cg              | -0.8          | -0.8617        | 0.062      | 0.5             |
| Hg_proR         | Cg              | -0.8          | -0.8491        | 0.049      | 0.5             |
| Hdb             | Cd              | -0.1          | -0.0577        | -0.042     | 0.5             |
| Hda             | Cd              | -0.1          | -0.0617        | -0.038     | 0.5             |
| Hdc             | Cd              | -0.1          | -0.0482        | -0.052     | 0.5             |

Quality  $n/\chi^2 = 9.95$

Table S5: Experimental  $^3J_{\text{HH}}$  compared with calculated values from the MDOC simulation 2 with RDC and  $^3J_{\text{HH}}$  constraints on BMIM $\cdot$ NTf $_2^-$

| Atom A  | Atom B  | $^3J_{\text{HH}}$ Exp. /Hz | $^3J_{\text{HH}}$ Calc. MDOC Sim. /Hz | $^3J_{\text{HH}}$ Calc. Start Molecule /Hz | Diff MDOC Sim. – Exp, /Hz | Error Exp.+ Calc. /Hz |
|---------|---------|----------------------------|---------------------------------------|--------------------------------------------|---------------------------|-----------------------|
| Ha proS | Hb proS | 7.2                        | 6.825                                 | 4.133                                      | -0.375                    | 1.15                  |
| Ha proS | Hb proR | 7.2                        | 6.335                                 | 3.549                                      | -0.865                    | 1.15                  |
| Ha proR | Hb proS | 7.2                        | 6.564                                 | 12.671                                     | -0.636                    | 1.15                  |
| Ha proR | Hb proR | 7.2                        | 6.688                                 | 2.388                                      | -0.512                    | 1.15                  |
| Hb proS | Hg proS | 7.2                        | 6.887                                 | 13.282                                     | -0.313                    | 1.15                  |
| Hb proS | Hg proR | 7.2                        | 6.536                                 | 3.162                                      | -0.664                    | 1.15                  |
| Hb proR | Hg proS | 7.2                        | 6.726                                 | 1.933                                      | -0.474                    | 1.15                  |
| Hb proR | Hg proR | 7.2                        | 6.868                                 | 13.282                                     | -0.332                    | 1.15                  |
| Hg proS | Hdb     | 7.2                        | 6.836                                 | 2.975                                      | -0.364                    | 1.15                  |
| Hg proS | Hda     | 7.2                        | 6.839                                 | 3.320                                      | -0.361                    | 1.15                  |
| Hg proS | Hdc     | 7.2                        | 6.837                                 | 13.994                                     | -0.363                    | 1.15                  |
| Hg proR | Hdb     | 7.2                        | 6.783                                 | 13.988                                     | -0.417                    | 1.15                  |
| Hg proR | Hda     | 7.2                        | 6.782                                 | 3.383                                      | -0.418                    | 1.15                  |
| Hg proR | Hdc     | 7.2                        | 6.786                                 | 2.534                                      | -0.414                    | 1.15                  |

Quality  $n/\chi^2 = 5.54$

### 6.3 Comparison of the MDOC simulation with only RDC constraints (MDOC 1) and the simulation including $^3J_{\text{HH}}$ constraints (MDOC 2)

Both simulations MDOC 1 and 2 are performed with the same simulation parameters – the only difference in MDOC 2 was that the pseudo-forces for the  $^3J_{\text{HH}}$  couplings are introduced. The calculation of the  $^3J_{\text{HH}}$  couplings was performed using the Altona equation (for details see <sup>[13]</sup>). Comparing the RDC tables S3 and S4 the additional constraints support the RDC results and lead to a slightly better score. As displayed in Fig S20 the case of the (N1-Ca-Cb-Cg) dihedral the population of the G- is suppressed and that of the G+ and A states got larger. The same holds partly for the (Ca-Cb-Cg-Cd) torsion.

An analysis of the combination of the torsions around Ca-Cb and Cb-Cg is given in table S4. Obviously, the action of the  $^3J_{\text{HH}}$  constraints has a marked influence on distribution of conformers.

|                                                                                                                              |                                                                                                                                                                                                                                                                                            |
|------------------------------------------------------------------------------------------------------------------------------|--------------------------------------------------------------------------------------------------------------------------------------------------------------------------------------------------------------------------------------------------------------------------------------------|
| 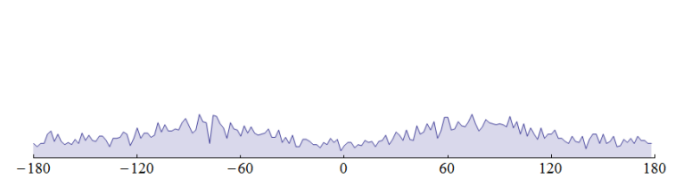                                            | <p>(C2-N1-C<math>\alpha</math>-C<math>\beta</math>)<br/>           Rotation about the N1-C<math>\alpha</math> bond<br/>           Slight preference of C<math>\beta</math> perpendicular<br/>           to the ring plane<br/> <b>MDOC 1</b></p>                                           |
|                                             | <p>(C2-N1-C<math>\alpha</math>-C<math>\beta</math>)<br/> <b>MDOC 2</b></p>                                                                                                                                                                                                                 |
|                                             | <p>(N1-C<math>\alpha</math>-C<math>\beta</math>-C<math>\gamma</math>)<br/>           Rotation about the C<math>\alpha</math>-C<math>\beta</math> bond<br/>           Ranges {Anti, Gauge -, Gauge +}<br/>           Ratio: {0.368, 0.324, 0.308}<br/> <b>MDOC 1</b></p>                    |
|                                             | <p>(N1-C<math>\alpha</math>-C<math>\beta</math>-C<math>\gamma</math>)<br/>           Ratio: {0.44, 0.159, 0.401}<br/> <b>MDOC 2</b></p>                                                                                                                                                    |
|                                            | <p>(C<math>\alpha</math>-C<math>\beta</math>-C<math>\gamma</math>-C<math>\delta</math>)<br/>           Rotation about the C<math>\beta</math>-C<math>\gamma</math> bond<br/>           Ranges: {Anti, Gauge -, Gauge +}<br/>           Ratio: {0.398, 0.305, 0.297}<br/> <b>MDOC 1</b></p> |
|                                           | <p>(C<math>\alpha</math>-C<math>\beta</math>-C<math>\gamma</math>-C<math>\delta</math>)<br/>           Ratio: {0.418, 0.211, 0.371}<br/> <b>MDOC 2</b></p>                                                                                                                                 |
| <p>Figure S20 Torsion distributions from the MDOC 1 and MDOC 2 simulations on BMIM<math>\cdot</math>NTf<math>_2^-</math></p> | <p>Remarks</p>                                                                                                                                                                                                                                                                             |

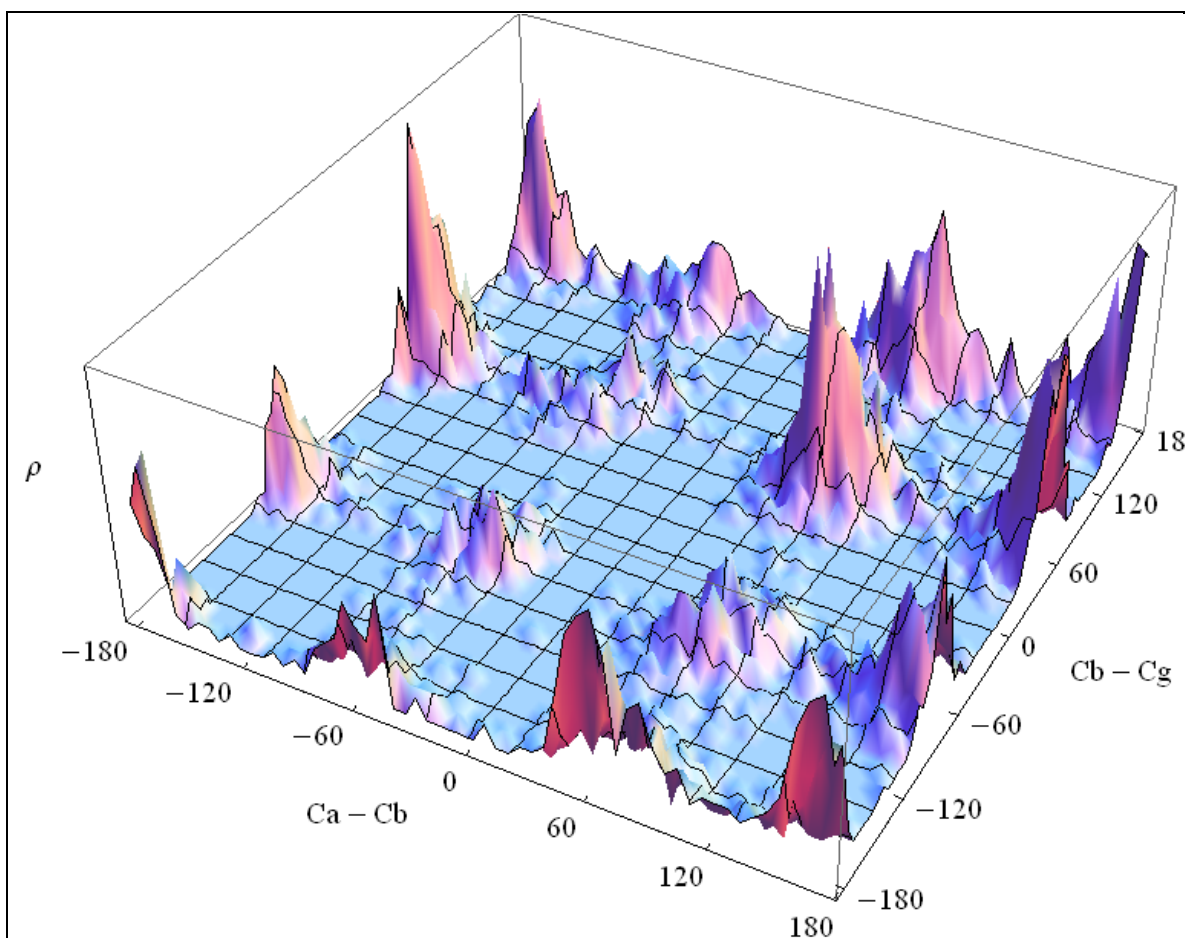

Figure S21: 2D map of conformer populations for the internal coordinates  $\{N1-C\alpha-C\beta-C\gamma\}$  ( $Ca-Cb$ ) and  $\{C\alpha-C\beta-C\gamma-C\delta\}$  ( $Cb-Cg$ ) for the MDOC 2 simulation with RDC and  ${}^3J_{HH}$  constraints. The combinations  $\{G-, G+\}$ ,  $\{G+, G-\}$  and  $\{G-, G-\}$  are less populated (the full population analysis is given in table S4)

Table S4: Conformer statistics for the torsion  $\{N1-C\alpha-C\beta-C\gamma\}$  and  $\{C\alpha-C\beta-C\gamma-C\delta\}$

| Conformer | Population / %<br>RDC constraints<br>only | Population / %<br>RDC and ${}^3J_{HH}$<br>constraints | Remarks                                                                                                                                    |
|-----------|-------------------------------------------|-------------------------------------------------------|--------------------------------------------------------------------------------------------------------------------------------------------|
| G+A       | 14.7                                      | 18.3                                                  | The following ranges are assumed:<br>Anti $\{-180$ to $-120$ and $120$ to $180\}$<br>Gauge + $\{0$ to $120\}$<br>Gauge - $\{-120$ to $0\}$ |
| G-A       | 15.1                                      | 7.5                                                   |                                                                                                                                            |
| AA        | 10.0                                      | 16.0                                                  |                                                                                                                                            |
| G+G+      | 10.2                                      | 15.2                                                  |                                                                                                                                            |
| G-G-      | 10.8                                      | 4.1                                                   |                                                                                                                                            |
| AG+       | 13.0                                      | 17.6                                                  |                                                                                                                                            |
| AG-       | 13.8                                      | 10.4                                                  |                                                                                                                                            |
| G+G-      | 5.9                                       | 6.7                                                   |                                                                                                                                            |
| G-G+      | 6.6                                       | 4.3                                                   |                                                                                                                                            |

## 7. Swelling of cross-linked DMA/ACN gels in different ionic liquids

Sticks between 1-2 cm of the 0.5% cross-linked DMA/ACN copolymer gel (0.0425 mmol EGDA) were cut and allowed to swell in  $\text{BMIM}\cdot\text{NTf}_2^-$ ,  $\text{BMIM}\cdot\text{BF}_4^-$ ,  $\text{BMIM}\cdot\text{PF}_6^-$ ,  $\text{EMIM}\cdot\text{BF}_4^-$  and  $\text{BMIM}\cdot[\text{N}(\text{CN})_2]^-$ . The sticks swelled, at room temperature, in all ionic liquids except  $\text{BMIM}\cdot\text{PF}_6^-$ . Furthermore, we found that in some ionic liquids the swelling process was faster, for example, the DMA/ACN copolymer gel takes a week to swell in  $\text{BMIM}\cdot[\text{N}(\text{CN})_2]^-$ , while in  $\text{BMIM}\cdot\text{NTf}_2^-$  and  $\text{EMIM}\cdot\text{BF}_4^-$  takes about a month. The swollen sticks grew to twice their original size.

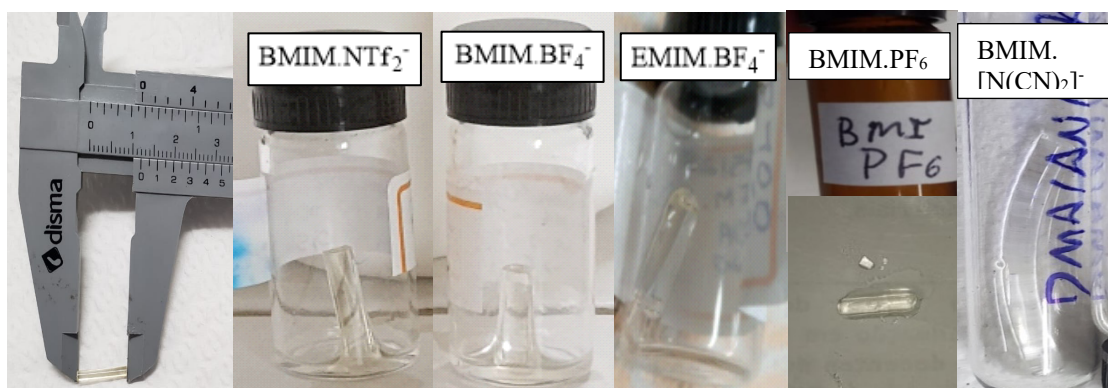

Figure S10. Swelling of DMA/ACN gels in different ionic liquids.

## 8. BMIM cation XYZ geometries (Å)

25

#1 E(RM062X) = -422.995906239 G+A

|   |           |           |           |
|---|-----------|-----------|-----------|
| C | -0.442000 | -0.755900 | 0.767200  |
| C | 0.696100  | -0.026300 | 0.934400  |
| N | 0.855100  | 0.736400  | -0.201300 |
| C | -0.156000 | 0.476000  | -1.031800 |
| N | -0.953200 | -0.430000 | -0.468600 |
| C | 1.959000  | 1.667900  | -0.455000 |
| C | -2.225400 | -0.928100 | -1.028800 |
| C | -3.424600 | -0.351700 | -0.281400 |
| C | -3.483700 | 1.174800  | -0.307400 |
| C | -4.752800 | 1.709000  | 0.354300  |



|   |           |           |           |
|---|-----------|-----------|-----------|
| H | -0.921000 | -1.475400 | 1.413200  |
| H | 1.400800  | 0.010600  | 1.750800  |
| H | -0.305700 | 0.927300  | -2.002000 |
| H | 1.972200  | 2.428800  | 0.325300  |
| H | 1.802400  | 2.140900  | -1.423300 |
| H | 2.899800  | 1.117500  | -0.464300 |
| H | -2.193300 | -2.018700 | -0.979500 |
| H | -2.237600 | -0.634300 | -2.081500 |
| H | -3.422800 | -0.712000 | 0.755000  |
| H | -4.322300 | -0.769700 | -0.750700 |
| H | -3.435500 | 1.522300  | -1.348400 |
| H | -2.605800 | 1.588600  | 0.207400  |
| H | -5.645300 | 1.345700  | -0.162800 |
| H | -4.776000 | 2.800500  | 0.337300  |
| H | -4.814500 | 1.387800  | 1.398300  |

25

#2 E(RM062X) = -422.995150721 G-A

|   |           |           |           |
|---|-----------|-----------|-----------|
| C | -0.441700 | -0.756100 | 0.766600  |
| C | 0.696300  | -0.026000 | 0.934800  |
| N | 0.854800  | 0.736200  | -0.201100 |
| C | -0.155500 | 0.475900  | -1.032200 |
| N | -0.954000 | -0.430000 | -0.468200 |
| C | 1.963000  | 1.662000  | -0.457400 |
| C | -2.219400 | -0.930600 | -1.045800 |
| C | -3.373500 | 0.041300  | -0.815800 |
| C | -3.664300 | 0.320700  | 0.658300  |
| C | -4.894100 | 1.209200  | 0.836800  |
| H | -0.925200 | -1.472100 | 1.413000  |
| H | 1.399100  | 0.013400  | 1.752500  |
| H | -0.299000 | 0.921500  | -2.006000 |
| H | 2.900700  | 1.106400  | -0.469000 |
| H | 1.806700  | 2.136300  | -1.425100 |
| H | 1.982000  | 2.422200  | 0.323300  |
| H | -2.040700 | -1.109800 | -2.108200 |
| H | -2.409500 | -1.894900 | -0.568700 |
| H | -3.172500 | 0.981300  | -1.345800 |

|   |           |           |           |
|---|-----------|-----------|-----------|
| H | -4.257000 | -0.398800 | -1.292200 |
| H | -3.816800 | -0.631200 | 1.184200  |
| H | -2.796100 | 0.804700  | 1.124600  |
| H | -5.784800 | 0.732200  | 0.418400  |
| H | -5.085000 | 1.408300  | 1.893200  |
| H | -4.759300 | 2.170900  | 0.332800  |

25

#3 E(RM062X) = -422.994791124 AA

|   |           |           |           |
|---|-----------|-----------|-----------|
| C | -0.441500 | -0.756300 | 0.767100  |
| C | 0.696100  | -0.026300 | 0.934600  |
| N | 0.854800  | 0.736600  | -0.201100 |
| C | -0.155400 | 0.475500  | -1.032200 |
| N | -0.953900 | -0.429500 | -0.468400 |
| C | 1.957600  | 1.669900  | -0.453400 |
| C | -2.212600 | -0.947700 | -1.039700 |
| C | -3.436800 | -0.346400 | -0.357600 |
| C | -4.731400 | -0.889000 | -0.965600 |
| C | -5.967300 | -0.298500 | -0.290200 |
| H | -0.920900 | -1.476100 | 1.412500  |
| H | 1.399600  | 0.012300  | 1.751700  |
| H | -0.300800 | 0.922400  | -2.004900 |
| H | 2.900000  | 1.122000  | -0.451800 |
| H | 1.807000  | 2.135300  | -1.426300 |
| H | 1.963000  | 2.436400  | 0.321400  |
| H | -2.196800 | -0.712900 | -2.107100 |
| H | -2.187300 | -2.035600 | -0.935500 |
| H | -3.408900 | -0.574300 | 0.715300  |
| H | -3.405100 | 0.746000  | -0.454900 |
| H | -4.751900 | -0.662600 | -2.038700 |
| H | -4.745900 | -1.981900 | -0.874700 |
| H | -5.988800 | 0.790500  | -0.393100 |
| H | -6.881800 | -0.694800 | -0.735700 |
| H | -5.983700 | -0.538000 | 0.777200  |

25

#4 E(RM062X) = -422.995682240 G+G+

|   |           |           |           |
|---|-----------|-----------|-----------|
| C | -0.441800 | -0.756000 | 0.767100  |
| C | 0.696100  | -0.026200 | 0.934500  |
| N | 0.855200  | 0.736400  | -0.201200 |
| C | -0.156000 | 0.475800  | -1.031800 |
| N | -0.953600 | -0.429900 | -0.468700 |
| C | 1.958000  | 1.669200  | -0.454000 |
| C | -2.220200 | -0.938800 | -1.032200 |
| C | -3.419900 | -0.433100 | -0.233100 |
| C | -3.510100 | 1.092100  | -0.143300 |
| C | -3.649200 | 1.781100  | -1.500600 |
| H | -0.920000 | -1.475500 | 1.413500  |
| H | 1.400000  | 0.011600  | 1.751500  |
| H | -0.301500 | 0.923700  | -2.004000 |
| H | 1.806400  | 2.135400  | -1.426400 |
| H | 2.900100  | 1.120900  | -0.454200 |
| H | 1.964900  | 2.435000  | 0.321400  |
| H | -2.160800 | -2.029300 | -1.028100 |
| H | -2.255200 | -0.606500 | -2.071800 |
| H | -3.393300 | -0.869700 | 0.771700  |
| H | -4.315400 | -0.834300 | -0.720800 |
| H | -2.635700 | 1.485100  | 0.393900  |
| H | -4.375000 | 1.341300  | 0.478200  |
| H | -2.759300 | 1.657600  | -2.128600 |
| H | -3.806400 | 2.854800  | -1.378200 |
| H | -4.501700 | 1.381300  | -2.058300 |

25

#5 E(RM062X) = -422.994887463 G-G-

|   |           |           |           |
|---|-----------|-----------|-----------|
| C | -0.441700 | -0.756000 | 0.766500  |
| C | 0.696400  | -0.025800 | 0.934800  |
| N | 0.855000  | 0.736000  | -0.201000 |
| C | -0.155500 | 0.476000  | -1.031900 |
| N | -0.954200 | -0.430300 | -0.468300 |
| C | 1.962700  | 1.662300  | -0.457300 |
| C | -2.219400 | -0.928200 | -1.048400 |
| C | -3.352800 | 0.081500  | -0.873400 |
| C | -3.659000 | 0.439100  | 0.583100  |

|   |           |           |           |
|---|-----------|-----------|-----------|
| C | -4.139100 | -0.747300 | 1.418800  |
| H | -0.922200 | -1.473900 | 1.412800  |
| H | 1.399100  | 0.013500  | 1.752500  |
| H | -0.298900 | 0.922000  | -2.005600 |
| H | 2.900500  | 1.106800  | -0.470300 |
| H | 1.805500  | 2.137700  | -1.424300 |
| H | 1.982200  | 2.421600  | 0.324300  |
| H | -2.030400 | -1.143200 | -2.102400 |
| H | -2.432500 | -1.874800 | -0.548400 |
| H | -3.112500 | 0.987100  | -1.443300 |
| H | -4.240600 | -0.355800 | -1.344300 |
| H | -2.776900 | 0.899400  | 1.048700  |
| H | -4.431400 | 1.213900  | 0.582200  |
| H | -3.373300 | -1.522700 | 1.531100  |
| H | -4.419000 | -0.426200 | 2.424300  |
| H | -5.016100 | -1.217000 | 0.963100  |

25

#6 E(RM062X) = -422.994137160 AG+

|   |           |           |           |
|---|-----------|-----------|-----------|
| C | -0.441500 | -0.756300 | 0.767000  |
| C | 0.696100  | -0.026100 | 0.934600  |
| N | 0.854900  | 0.736400  | -0.201100 |
| C | -0.155600 | 0.475600  | -1.032100 |
| N | -0.953900 | -0.429600 | -0.468400 |
| C | 1.957100  | 1.670800  | -0.452800 |
| C | -2.212700 | -0.947900 | -1.038800 |
| C | -3.432000 | -0.327300 | -0.361500 |
| C | -4.741400 | -0.794800 | -1.005500 |
| C | -4.970700 | -2.303100 | -0.907700 |
| H | -0.920900 | -1.476300 | 1.412200  |
| H | 1.399600  | 0.012200  | 1.751900  |
| H | -0.300900 | 0.922500  | -2.004800 |
| H | 2.900900  | 1.125800  | -0.436800 |
| H | 1.814300  | 2.125200  | -1.432100 |
| H | 1.952900  | 2.445500  | 0.313900  |
| H | -2.195300 | -0.721400 | -2.108400 |
| H | -2.186600 | -2.033700 | -0.924100 |

|   |           |           |           |
|---|-----------|-----------|-----------|
| H | -3.429100 | -0.593900 | 0.703000  |
| H | -3.351600 | 0.764100  | -0.422500 |
| H | -5.562100 | -0.268000 | -0.510200 |
| H | -4.763600 | -0.478300 | -2.055500 |
| H | -4.893800 | -2.646400 | 0.129600  |
| H | -5.967800 | -2.564600 | -1.267800 |
| H | -4.255500 | -2.872900 | -1.509300 |

25

#7 E(RM062X) = -422.994189575 AG-

|   |           |           |           |
|---|-----------|-----------|-----------|
| C | -0.441500 | -0.756200 | 0.767100  |
| C | 0.696100  | -0.026400 | 0.934600  |
| N | 0.854800  | 0.736800  | -0.201100 |
| C | -0.155400 | 0.475400  | -1.032200 |
| N | -0.954000 | -0.429500 | -0.468400 |
| C | 1.957400  | 1.670300  | -0.453200 |
| C | -2.211200 | -0.948400 | -1.041800 |
| C | -3.433000 | -0.339700 | -0.358600 |
| C | -4.739900 | -0.932400 | -0.895500 |
| C | -4.960600 | -0.682800 | -2.387600 |
| H | -0.920400 | -1.476500 | 1.412300  |
| H | 1.399800  | 0.011800  | 1.751700  |
| H | -0.301100 | 0.922500  | -2.004800 |
| H | 1.962300  | 2.436900  | 0.321600  |
| H | 1.806800  | 2.135600  | -1.426100 |
| H | 2.899800  | 1.122600  | -0.451400 |
| H | -2.189800 | -2.036400 | -0.931000 |
| H | -2.186500 | -0.718500 | -2.109000 |
| H | -3.422700 | 0.746500  | -0.513300 |
| H | -3.363700 | -0.513600 | 0.721300  |
| H | -5.563500 | -0.491800 | -0.326200 |
| H | -4.764100 | -2.008900 | -0.687100 |
| H | -4.880600 | 0.383700  | -2.624200 |
| H | -5.956500 | -1.013200 | -2.689600 |
| H | -4.243200 | -1.226200 | -3.010900 |

25

#8 E(RM062X) = -422.994276346 G+G-

|   |           |           |           |
|---|-----------|-----------|-----------|
| C | -0.441900 | -0.756400 | 0.766800  |
| C | 0.696000  | -0.026300 | 0.934500  |
| N | 0.854800  | 0.736700  | -0.201200 |
| C | -0.155700 | 0.475400  | -1.032300 |
| N | -0.953200 | -0.429400 | -0.467800 |
| C | 1.960200  | 1.666300  | -0.455400 |
| C | -2.236400 | -0.907000 | -1.017700 |
| C | -3.436800 | -0.298100 | -0.296300 |
| C | -3.502700 | 1.235400  | -0.343000 |
| C | -2.731400 | 1.946700  | 0.772800  |
| H | -0.923900 | -1.472100 | 1.414900  |
| H | 1.400600  | 0.010900  | 1.750900  |
| H | -0.304800 | 0.926700  | -2.002500 |
| H | 2.899400  | 1.113600  | -0.472000 |
| H | 1.800000  | 2.145100  | -1.420300 |
| H | 1.978700  | 2.422800  | 0.328900  |
| H | -2.239000 | -0.636900 | -2.076800 |
| H | -2.229200 | -1.996900 | -0.945800 |
| H | -4.319800 | -0.728200 | -0.780000 |
| H | -3.458100 | -0.645600 | 0.744000  |
| H | -3.164100 | 1.588400  | -1.327300 |
| H | -4.552700 | 1.532400  | -0.271400 |
| H | -1.650200 | 1.775400  | 0.728800  |
| H | -2.890700 | 3.026200  | 0.720600  |
| H | -3.077600 | 1.609500  | 1.754700  |

25

#9 E(RM062X) = -422.993604124 G-G+

|   |           |           |           |
|---|-----------|-----------|-----------|
| C | -0.441800 | -0.756200 | 0.765900  |
| C | 0.696500  | -0.025700 | 0.935000  |
| N | 0.854500  | 0.735900  | -0.201000 |
| C | -0.155400 | 0.475700  | -1.032300 |
| N | -0.953800 | -0.429700 | -0.467600 |
| C | 1.960000  | 1.665400  | -0.455500 |
| C | -2.234000 | -0.906200 | -1.031000 |
| C | -3.313700 | 0.173500  | -1.021800 |

|   |           |           |           |
|---|-----------|-----------|-----------|
| C | -3.621100 | 0.770300  | 0.359400  |
| C | -2.718100 | 1.937100  | 0.771300  |
| H | -0.924500 | -1.471800 | 1.413300  |
| H | 1.399600  | 0.013400  | 1.752400  |
| H | -0.302800 | 0.928400  | -2.002300 |
| H | 2.899200  | 1.112400  | -0.470400 |
| H | 1.800600  | 2.143100  | -1.421000 |
| H | 1.977500  | 2.422500  | 0.328300  |
| H | -2.033400 | -1.270900 | -2.041200 |
| H | -2.529300 | -1.760100 | -0.417400 |
| H | -3.043800 | 0.972400  | -1.724500 |
| H | -4.209400 | -0.302500 | -1.434100 |
| H | -4.654300 | 1.128300  | 0.349200  |
| H | -3.588900 | -0.022200 | 1.119300  |
| H | -2.737100 | 2.725200  | 0.011400  |
| H | -3.066300 | 2.377100  | 1.708500  |
| H | -1.675800 | 1.639100  | 0.928200  |

## 9. References

- [1] K. Stott, J. Keeler, Q. N. Van, A. J. Shaka, *J. Magn. Reson.* **1997**, *125*, 302–324.
- [2] MNova 14.1 <https://mestrelab.com/software/mnova/>, **2022**.
- [3] Gaussian 09, Revision C.01, M. J. Frisch, G. W. Trucks, H. B. Schlegel, G. E. Scuseria, M. A. Robb, J. R. Cheeseman, G. Scalmani, V. Barone, G. A. Petersson, H. Nakatsuji, X. Li, M. Caricato, A. Marenich, J. Bloino, B. G. Janesko, R. Gomperts, B. Mennucci, H. P. Hratchian, J. V. Ortiz, A. F. Izmaylov, J. L. Sonnenberg, D. Williams-Young, F. Ding, F. Lipparini, F. Egidi, J. Goings, B. Peng, A. Petrone, T. Henderson, D. Ranasinghe, V. G. Zakrzewski, J. Gao, N. Rega, G. Zheng, W. Liang, M. Hada, M. Ehara, K. Toyota, R. Fukuda, J. Hasegawa, M. Ishida, T. Nakajima, Y. Honda, O. Kitao, H. Nakai, T. Vreven, K. Throssell, J. A. Montgomery, Jr., J. E. Peralta, F. Ogliaro, M. Bearpark, J. J. Heyd, E. Brothers, K. N. Kudin, V. N. Staroverov, T. Keith, R. Kobayashi, J. Normand, K. Raghavachari, A. Rendell, J. C. Burant, S. S. Iyengar, J. Tomasi, M. Cossi, J. M. Millam, M. Klene, C. Adamo, R. Cammi, J. W. Ochterski, R. L. Martin, K. Morokuma, O. Farkas, J. B. Foresman, and D. J. Fox, Gaussian, Inc., Wallingford CT, 2016.
- [4] A. Navarro-Vázquez, *Magn. Reson. Chem.* **2012**, *50*, S73–S79.
- [5] G. Cornilescu, J. L. Marquardt, M. Ottiger, A. Bax, *J. Am. Chem. Soc.* **1998**, *120*, 6836–6837.
- [6] V. M. Sánchez-Pedregal, R. Santamaría-Fernández, A. Navarro-Vázquez, *Org. Lett.* **2009**, *11*, 1471–1474.
- [7] F. Kramer, M. V. Deshmukh, H. Kessler, S. J. Glaser, *Concepts Magn. Reson. Part A* **2004**, *21A*, 10–21.
- [8] P. Tzvetkova, U. Sternberg, T. Gloge, A. Navarro-Vázquez, B. Luy, *Chem. Sci.* **2019**, *10*, 8774–8791.

- [9] A. E. Torda, R. M. Scheek, W. F. van Gunsteren, *Chem. Phys. Lett.* **1989**, *157*, 289–294.
- [10] M. Möllhoff, U. Sternberg, *J. Mol. Model.* **2001**, *7*, 90–102.
- [11] U. Sternberg, F.-T. Koch, M. Bräuer, M. Kunert, E. Anders, *J. Mol. Model.* **2001**, *7*, 54–64.
- [12] COSMOS 6.0 [http://www.cosmos-software.de/intro\\_e.html](http://www.cosmos-software.de/intro_e.html), **2022**.
- [13] U. Sternberg, P. Tzvetkova, and C. Muhle-Goll, The Simulation of NMR Data of Flexible Molecules - Sagittamide A as Example for MD Simulations with Orientational Constraints; *Phys. Chem. Chem. Phys.*, 2020, **22**, 17375, DOI: 10.1039/D0CP01905D.
